# Supplementary material
Source: PubMed Central journal article supplement (PMC6669896)
Supplement: jamacardiol-4-874-s001.pdf [file jamacardiol-4-874-s001.pdf]

## Supplementary Online Content

Wang T, Lu J, Su Q, et al; 4C Study Group. Ideal cardiovascular health metrics and major cardiovascular events in patients with prediabetes and diabetes. *JAMA Cardiol*. Published online July 31, 2019. doi:10.1001/jamacardio.2019.2499

**eTable 1.** Definitions of 7 Ideal Cardiovascular Health Metrics in Participants With Prediabetes or Diabetes

**eTable 2.** Risk of CVD Events and High HbA1c According to BMI Categories Defined by Different Cutoff Points

**eTable 3.** Hazard Ratio (95% CI) of CVD Events Among Participants With Prediabetes or Diabetes, as Compared With Participants With Normal Glucose Regulation

**eTable 4.** Hazard Ratio (95% CI) of CVD Events According to Combined Ideal Cardiovascular Health Metrics Among Participants With Normal Glucose Regulation, Prediabetes, and Diabetes

**eTable 5.** Hazard Ratio (95% CI) of Non-fatal CVD Events and CVD Mortality According to Individual and Combined Ideal Cardiovascular Health Metrics Among Participants With Prediabetes or Diabetes Compared With Participants With Normal Glucose Regulation

**eTable 6.** Hazard Ratio (95% CI) of Non-fatal CVD Events and CVD Mortality According to Individual and Combined Ideal Cardiovascular Health Metrics Among Participants With Prediabetes or Diabetes

This supplementary material has been provided by the authors to give readers additional information about their work.

**eTable 1. Definitions of 7 ideal cardiovascular health metrics in participants with prediabetes or diabetes<sup>a</sup>**

| <b>Cardiovascular health metrics</b> | <b>Ideal level</b>                                                                                                    |
|--------------------------------------|-----------------------------------------------------------------------------------------------------------------------|
| Smoking                              | Never or quit >12 months                                                                                              |
| Body mass index                      | < 23 kg/m <sup>2</sup>                                                                                                |
| Physical activity                    | ≥ 150 min/week moderate intensity or ≥ 75 min/week vigorous intensity or ≥ 150 min/week moderate + vigorous intensity |
| Healthy diet                         | Fruits and vegetables intake ≥ 4.5 cups/day                                                                           |
| Total cholesterol                    | < 200 mg/dL (untreated)                                                                                               |
| Blood pressure                       | < 120/<80 mm Hg (untreated)                                                                                           |
| Glycated hemoglobin A1c              |                                                                                                                       |
| For prediabetes                      | < 5.7%                                                                                                                |
| For diabetes                         | < 6.5%                                                                                                                |

<sup>a</sup> Definitions were adapted from the recommendations of the Goals and Metrics Committee of the Strategic Planning Task Force of the American Heart Association.<sup>1</sup>

Reference:

1. Lloyd-Jones DM, Hong Y, Labarthe D, et al; American Heart Association Strategic Planning Task Force and Statistics Committee. Defining and setting national goals for cardiovascular health promotion and disease reduction: the American Heart Association's strategic Impact Goal through 2020 and beyond. *Circulation* 2010; 121:586-613.

**eTable 2. Risk of CVD events and high HbA1c according to BMI categories defined by different cutoff points**

| Analysis                                       | BMI (kg/m <sup>2</sup> ) |                      |                      |                   |
|------------------------------------------------|--------------------------|----------------------|----------------------|-------------------|
|                                                | < 23<br>(n=37590)        | 23-< 24<br>(n=13464) | 24-< 25<br>(n=13469) | ≥ 25<br>(n=47242) |
| Association between BMI and CVD events         |                          |                      |                      |                   |
| CVD cases, n (%)                               | 798 (2.1)                | 324 (2.4)            | 346 (2.6)            | 1414 (3.0)        |
| HR (95% CI) <sup>a</sup>                       | 1.00 (Ref.)              | 1.10 (0.96-1.25)     | 1.10 (0.97-1.25)     | 1.19 (1.09-1.30)  |
| Association between BMI and high HbA1c (≥ 6.5) |                          |                      |                      |                   |
| High HbA1c, n (%)                              | 3365 (9.0)               | 1699 (12.6)          | 2071 (15.4)          | 9918 (21.0)       |
| OR (95% CI) <sup>b</sup>                       | 1.00 (Ref.)              | 1.41 (1.32-1.50)     | 1.71 (1.61-1.82)     | 2.41 (2.31-2.52)  |
| Analysis                                       | BMI (kg/m <sup>2</sup> ) |                      |                      |                   |
|                                                | ≥ 23 vs. < 23            | ≥ 24 vs. < 24        | ≥ 25 vs. < 25        |                   |
| Association between BMI and CVD events         |                          |                      |                      |                   |
| HR (95% CI) <sup>a</sup>                       | 1.16 (1.06-1.26)         | 1.14 (1.05-1.23)     | 1.14 (1.05-1.22)     |                   |
| Association between BMI and high HbA1c (≥ 6.5) |                          |                      |                      |                   |
| OR (95% CI) <sup>b</sup>                       | 2.08 (1.99-2.17)         | 2.02 (1.95-2.10)     | 1.94 (1.88-2.01)     |                   |

<sup>a</sup> HR (95% CI) for incident CVD events, which were adjusted for age, sex, education attainment (below high school, high school or above), family history of diabetes (yes or no), family history of CVD (yes or no), smoking status (ideal or not), physical activity (ideal or not), healthy diet (ideal or not), total cholesterol (ideal or not), blood pressure (ideal or not), and HbA1c (ideal or not).

<sup>b</sup> OR (95% CI) for high HbA1c at baseline, which were adjusted for age, sex, education attainment (below high school, high school or above), family history of diabetes (yes or no), family history of CVD (yes or no), smoking status (ideal or not), physical activity (ideal or not), healthy diet (ideal or not), total cholesterol (ideal or not), and blood pressure (ideal or not).

**eTable 3. Hazard ratio (95% CI) of CVD events among participants with prediabetes or diabetes, as compared with participants with normal glucose regulation<sup>a</sup>**

| <b>Category</b>           | <b>Person-years</b> | <b>Cases</b> | <b>Unadjusted HR (95% CI)</b> | <b>Multivariable-adjusted HR (95% CI)<sup>b</sup></b> |
|---------------------------|---------------------|--------------|-------------------------------|-------------------------------------------------------|
| Normal glucose regulation | 92244               | 453          | 1.00                          | 1.00                                                  |
| Prediabetes               | 220763              | 1322         | 1.23 (1.11-1.37)              | 0.98 (0.88-1.09)                                      |
| Diabetes                  | 93058               | 1107         | 2.45 (2.20-2.73)              | 1.56 (1.40-1.75)                                      |

<sup>a</sup> 111765 participants (24881 with normal glucose regulation, 61024 with prediabetes, and 25860 with diabetes) were included in the analysis.

<sup>b</sup> Adjusted for age, sex, education attainment (below high school, high school or above), family history of diabetes (yes or no), and family history of CVD (yes or no).

**eTable 4. Hazard ratio (95% CI) of CVD events according to combined ideal cardiovascular health metrics among participants with normal glucose regulation, prediabetes, and diabetes <sup>a</sup>**

| Category                                      | Person-years | Cases | HR (95% CI) <sup>b</sup> |
|-----------------------------------------------|--------------|-------|--------------------------|
| <b>Normal glucose regulation</b>              |              |       |                          |
| Number of ideal cardiovascular health metrics |              |       |                          |
| ≤ 1                                           | 1992         | 14    | 1.00                     |
| 2                                             | 12602        | 109   | 1.18 (0.67-2.07)         |
| 3                                             | 24979        | 150   | 0.90 (0.51-1.57)         |
| 4                                             | 26643        | 122   | 0.79 (0.45-1.39)         |
| ≥ 5                                           | 26028        | 58    | 0.52 (0.28-0.94)         |
| Each 1-number increment in ideal metrics      | -            | -     | 0.81 (0.74-0.88)         |
| <b>Prediabetes</b>                            |              |       |                          |
| Number of ideal cardiovascular health metrics |              |       |                          |
| ≤ 1                                           | 32967        | 307   | 1.00                     |
| 2                                             | 60272        | 436   | 0.80 (0.69-0.93)         |
| 3                                             | 64473        | 351   | 0.66 (0.56-0.77)         |
| 4                                             | 42146        | 174   | 0.55 (0.46-0.67)         |
| ≥ 5                                           | 20906        | 54    | 0.42 (0.32-0.57)         |
| Each 1-number increment in ideal metrics      | -            | -     | 0.82 (0.79-0.86)         |
| <b>Diabetes</b>                               |              |       |                          |
| Number of ideal cardiovascular health metrics |              |       |                          |
| ≤ 1                                           | 17554        | 272   | 1.00                     |
| 2                                             | 28819        | 366   | 0.81 (0.69-0.95)         |
| 3                                             | 26777        | 305   | 0.74 (0.63-0.87)         |
| 4                                             | 14000        | 133   | 0.64 (0.52-0.79)         |
| ≥ 5                                           | 5909         | 31    | 0.39 (0.27-0.56)         |
| Each 1-number increment in ideal metrics      | -            | -     | 0.85 (0.80-0.89)         |

<sup>a</sup> 111765 participants (24881 with normal glucose regulation, 61024 with prediabetes, and 25860 with diabetes) were included in the analysis.

<sup>b</sup> Adjusted for age, sex, education attainment (below high school, high school or above), family history of diabetes (yes or no), and family history of CVD (yes or no). The P value for interaction between the number of ideal cardiovascular health metrics and diabetes status on CVD events was 0.088.

**eTable 5. Hazard ratio (95% CI) of non-fatal CVD events and CVD mortality according to individual and combined ideal cardiovascular health metrics among participants with prediabetes or diabetes, as compared with participants with normal glucose regulation <sup>a</sup>**

| Category                                      | Non-fatal CVD events |       |                          | CVD mortality             |       |                          |
|-----------------------------------------------|----------------------|-------|--------------------------|---------------------------|-------|--------------------------|
|                                               | Person-years         | Cases | HR (95% CI) <sup>b</sup> | Person-years <sup>c</sup> | Cases | HR (95% CI) <sup>b</sup> |
| <b>Normal glucose regulation</b>              | 92244                | 385   | 1.00                     | 92844                     | 68    | 1.00                     |
| <b>Prediabetes</b>                            |                      |       |                          |                           |       |                          |
| Ideal smoking status                          | 178928               | 847   | 0.85 (0.74-0.99)         | 180119                    | 170   | 1.14 (0.82-1.58)         |
| Ideal body mass index                         | 74792                | 296   | 0.76 (0.64-0.91)         | 75193                     | 87    | 1.32 (0.92-1.87)         |
| Physical activity at goal                     | 32903                | 135   | 0.75 (0.61-0.93)         | 33075                     | 22    | 0.95 (0.57-1.58)         |
| Healthy diet                                  | 101942               | 430   | 0.79 (0.67-0.93)         | 102554                    | 78    | 1.01 (0.70-1.45)         |
| Untreated total cholesterol < 200 mg/dl       | 122210               | 517   | 0.81 (0.70-0.95)         | 122920                    | 115   | 1.15 (0.82-1.61)         |
| Untreated blood pressure < 120/80 mm Hg       | 58472                | 134   | 0.55 (0.45-0.69)         | 58631                     | 22    | 0.72 (0.43-1.21)         |
| Glycated hemoglobin A1c < 5.7%                | 50843                | 251   | 0.98 (0.83-1.15)         | 51195                     | 60    | 1.39 (0.98-1.97)         |
| Number of ideal cardiovascular health metrics |                      |       |                          |                           |       |                          |
| ≤ 1                                           | 32967                | 262   | 1.40 (1.20-1.64)         | 33371                     | 45    | 1.17 (0.80-1.70)         |
| 2                                             | 60272                | 352   | 1.06 (0.92-1.23)         | 60775                     | 84    | 1.28 (0.93-1.77)         |
| 3                                             | 64473                | 290   | 0.88 (0.75-1.02)         | 64893                     | 61    | 1.05 (0.74-1.48)         |
| 4                                             | 42146                | 146   | 0.74 (0.61-0.89)         | 42323                     | 28    | 0.85 (0.54-1.31)         |
| ≥ 5                                           | 20906                | 44    | 0.52 (0.38-0.72)         | 20959                     | 10    | 0.89 (0.46-1.73)         |
| <b>Diabetes</b>                               |                      |       |                          |                           |       |                          |
| Ideal smoking status                          | 74324                | 672   | 1.25 (1.08-1.45)         | 75357                     | 174   | 1.82 (1.32-2.49)         |
| Ideal body mass index                         | 20848                | 164   | 1.20 (0.99-1.46)         | 21099                     | 71    | 2.51 (1.76-3.57)         |
| Physical activity at goal                     | 12868                | 109   | 1.22 (0.97-1.53)         | 13074                     | 28    | 2.01 (1.27-3.21)         |
| Healthy diet                                  | 41844                | 354   | 1.22 (1.04-1.44)         | 42371                     | 96    | 1.95 (1.38-2.75)         |
| Untreated total cholesterol < 200 mg/dl       | 45014                | 378   | 1.24 (1.06-1.45)         | 45590                     | 105   | 1.89 (1.35-2.63)         |
| Untreated blood pressure < 120/80 mm Hg       | 13418                | 50    | 0.73 (0.54-0.99)         | 13477                     | 21    | 2.08 (1.26-3.45)         |
| Glycated hemoglobin A1c < 6.5%                | 31659                | 259   | 1.23 (1.05-1.44)         | 32083                     | 78    | 1.81 (1.30-2.52)         |

| Number of ideal cardiovascular health metrics |       |     |                  |       |    |                  |
|-----------------------------------------------|-------|-----|------------------|-------|----|------------------|
| ≤ 1                                           | 17554 | 225 | 2.11 (1.79-2.50) | 17890 | 47 | 1.97 (1.36-2.87) |
| 2                                             | 28819 | 295 | 1.65 (1.41-1.92) | 29282 | 71 | 1.70 (1.21-2.39) |
| 3                                             | 26777 | 236 | 1.43 (1.21-1.68) | 27138 | 69 | 1.80 (1.28-2.53) |
| 4                                             | 14000 | 100 | 1.19 (0.95-1.49) | 14167 | 33 | 1.98 (1.30-3.00) |
| ≥ 5                                           | 5909  | 21  | 0.66 (0.43-1.03) | 5934  | 10 | 1.60 (0.82-3.12) |

<sup>a</sup> 111765 participants (24881 with normal glucose regulation, 61024 with prediabetes, and 25860 with diabetes) were included in the analysis.

<sup>b</sup> Adjusted for age, sex, education attainment (below high school, high school or above), family history of diabetes (yes or no), and family history of CVD (yes or no). Individual cardiovascular health metrics were mutually adjusted.

<sup>c</sup> Person-years for CVD mortality was longer than that for non-fatal CVD events, because participants may have experienced more than one CVD event.

**eTable 6. Hazard ratio (95% CI) of non-fatal CVD events and CVD mortality according to individual and combined ideal cardiovascular health metrics among participants with prediabetes or diabetes <sup>a</sup>**

| Category                                      | Non-fatal CVD events |       |                          | CVD mortality             |       |                          |
|-----------------------------------------------|----------------------|-------|--------------------------|---------------------------|-------|--------------------------|
|                                               | Person-years         | Cases | HR (95% CI) <sup>b</sup> | Person-years <sup>c</sup> | Cases | HR (95% CI) <sup>b</sup> |
| <b>Prediabetes</b>                            |                      |       |                          |                           |       |                          |
| Smoking status                                |                      |       |                          |                           |       |                          |
| Non-ideal                                     | 41835                | 247   | 1.00                     | 42202                     | 58    | 1.00                     |
| Ideal                                         | 178928               | 847   | 0.80 (0.67-0.96)         | 180119                    | 170   | 0.79 (0.56-1.12)         |
| Body mass index                               |                      |       |                          |                           |       |                          |
| Non-ideal                                     | 145971               | 798   | 1.00                     | 147127                    | 141   | 1.00                     |
| Ideal                                         | 74792                | 296   | 0.77 (0.67-0.89)         | 75193                     | 87    | 1.16 (0.88-1.52)         |
| Physical activity                             |                      |       |                          |                           |       |                          |
| Non-ideal                                     | 187860               | 959   | 1.00                     | 189245                    | 206   | 1.00                     |
| Ideal                                         | 32903                | 135   | 0.82 (0.69-0.99)         | 33075                     | 22    | 0.81 (0.52-1.26)         |
| Healthy diet                                  |                      |       |                          |                           |       |                          |
| Non-ideal                                     | 118821               | 664   | 1.00                     | 119767                    | 150   | 1.00                     |
| Ideal                                         | 101941               | 430   | 0.84 (0.75-0.96)         | 102554                    | 78    | 0.80 (0.60-1.05)         |
| Total cholesterol                             |                      |       |                          |                           |       |                          |
| Non-ideal                                     | 98553                | 577   | 1.00                     | 99400                     | 113   | 1.00                     |
| Ideal                                         | 122210               | 517   | 0.82 (0.72-0.92)         | 122920                    | 115   | 0.90 (0.69-1.18)         |
| Blood pressure                                |                      |       |                          |                           |       |                          |
| Non-ideal                                     | 162291               | 960   | 1.00                     | 163689                    | 206   | 1.00                     |
| Ideal                                         | 58472                | 134   | 0.57 (0.47-0.69)         | 58631                     | 22    | 0.62 (0.39-0.97)         |
| Glycated hemoglobin A1c                       |                      |       |                          |                           |       |                          |
| Non-ideal                                     | 169920               | 843   | 1.00                     | 171126                    | 168   | 1.00                     |
| Ideal                                         | 50843                | 251   | 1.08 (0.93-1.24)         | 51195                     | 60    | 1.30 (0.97-1.76)         |
| Number of ideal cardiovascular health metrics |                      |       |                          |                           |       |                          |
| ≤ 1                                           | 32967                | 262   | 1.00                     | 33371                     | 45    | 1.00                     |



|                                               |       |     |                  |       |     |                  |
|-----------------------------------------------|-------|-----|------------------|-------|-----|------------------|
| 2                                             | 60272 | 352 | 0.75 (0.64-0.88) | 60775 | 84  | 1.09 (0.76-1.57) |
| 3                                             | 64473 | 290 | 0.62 (0.52-0.73) | 64893 | 61  | 0.90 (0.61-1.32) |
| 4                                             | 42146 | 146 | 0.52 (0.42-0.64) | 42323 | 28  | 0.74 (0.46-1.18) |
| ≥ 5                                           | 20906 | 44  | 0.37 (0.27-0.51) | 20959 | 10  | 0.81 (0.41-1.61) |
| Each 1-number increment in ideal metrics      | -     | -   | 0.81 (0.77-0.85) | -     | -   | 0.92 (0.82-1.03) |
| <b>Diabetes</b>                               |       |     |                  |       |     |                  |
| Smoking status                                |       |     |                  |       |     |                  |
| Non-ideal                                     | 18734 | 205 | 1.00             | 19054 | 56  | 1.00             |
| Ideal                                         | 74324 | 672 | 0.83 (0.68-0.99) | 75357 | 174 | 0.77 (0.54-1.10) |
| Body mass index                               |       |     |                  |       |     |                  |
| Non-ideal                                     | 72210 | 713 | 1.00             | 73311 | 159 | 1.00             |
| Ideal                                         | 20848 | 164 | 0.86 (0.73-1.03) | 21099 | 71  | 1.51 (1.13-2.01) |
| Physical activity                             |       |     |                  |       |     |                  |
| Non-ideal                                     | 80190 | 768 | 1.00             | 81336 | 202 | 1.00             |
| Ideal                                         | 12868 | 109 | 0.90 (0.74-1.10) | 13074 | 28  | 0.97 (0.65-1.44) |
| Healthy diet                                  |       |     |                  |       |     |                  |
| Non-ideal                                     | 51214 | 523 | 1.00             | 52039 | 134 | 1.00             |
| Ideal                                         | 41844 | 354 | 0.88 (0.77-1.01) | 42371 | 96  | 0.93 (0.72-1.22) |
| Total cholesterol                             |       |     |                  |       |     |                  |
| Non-ideal                                     | 48044 | 499 | 1.00             | 48821 | 125 | 1.00             |
| Ideal                                         | 45014 | 378 | 0.82 (0.72-0.94) | 45590 | 105 | 0.86 (0.66-1.13) |
| Blood pressure                                |       |     |                  |       |     |                  |
| Non-ideal                                     | 79641 | 827 | 1.00             | 80933 | 209 | 1.00             |
| Ideal                                         | 13417 | 50  | 0.45 (0.34-0.61) | 13477 | 21  | 0.94 (0.59-1.48) |
| Glycated hemoglobin A1c                       |       |     |                  |       |     |                  |
| Non-ideal                                     | 61400 | 618 | 1.00             | 62328 | 152 | 1.00             |
| Ideal                                         | 31658 | 259 | 0.82 (0.71-0.95) | 32083 | 78  | 0.93 (0.70-1.22) |
| Number of ideal cardiovascular health metrics |       |     |                  |       |     |                  |
| ≤ 1                                           | 17554 | 225 | 1.00             | 17890 | 47  | 1.00             |

|                                          |       |     |                  |       |    |                  |
|------------------------------------------|-------|-----|------------------|-------|----|------------------|
| 2                                        | 28819 | 295 | 0.79 (0.66-0.94) | 29282 | 71 | 0.90 (0.62-1.31) |
| 3                                        | 26777 | 236 | 0.69 (0.57-0.83) | 27138 | 69 | 0.95 (0.65-1.37) |
| 4                                        | 14000 | 100 | 0.57 (0.45-0.73) | 14167 | 33 | 1.01 (0.64-1.57) |
| ≥ 5                                      | 5909  | 21  | 0.31 (0.20-0.49) | 5934  | 10 | 0.80 (0.40-1.58) |
| Each 1-number increment in ideal metrics | -     | -   | 0.81 (0.77-0.86) | -     | -  | 0.98 (0.88-1.10) |

<sup>a</sup> 61024 participants with prediabetes and 25860 with diabetes were included in the analysis.

<sup>b</sup> Adjusted for age, sex, education attainment (below high school, high school or above), family history of diabetes (yes or no), and family history of CVD (yes or no). Individual cardiovascular health metrics were mutually adjusted.

<sup>c</sup> Person-years for CVD mortality was longer than that for non-fatal CVD events, because participants may have experienced more than one CVD event.
